# Supplementary material for: Nanostring-Based Identification of the Gene Expression Profile in Trigger Finger Samples
Source: MDPI journal article supplement (doi:10.3390/healthcare9111592), 2021-11-20
Supplement: s1 [file s1]

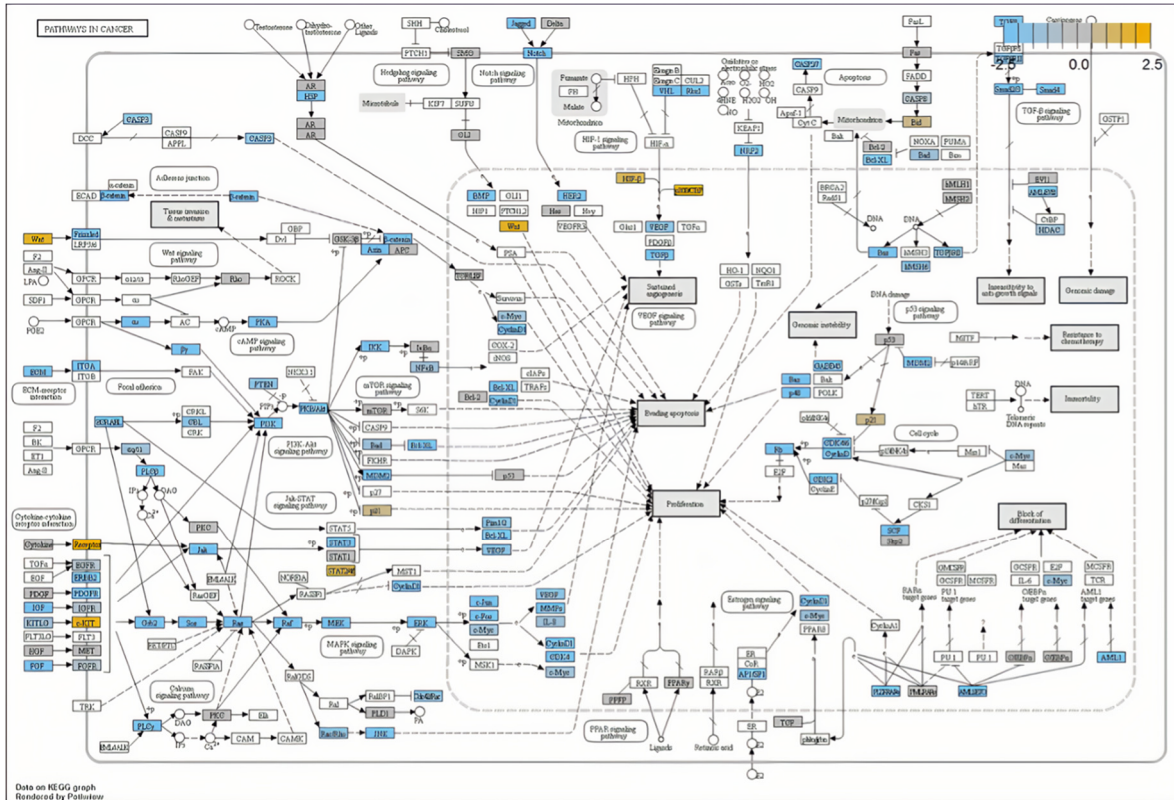

**Figure S1.** Pathview analysis done by NanoString nSolver software showing a comprehensive pathway roadmap for differentially expressed genes within various KEGG pathways of our samples. Elements over-expressed are shown in gold, elements under-expressed are shown in blue, and elements with unchanged expression are shown in gray.
